# Supplementary material for: Expectation propagation for large scale Bayesian inference of non-linear molecular networks from perturbation data
Source: PLoS One. 2017 Feb 6;12(2):e0171240. doi: 10.1371/journal.pone.0171240 (PMC5293552; doi:10.1371/journal.pone.0171240)
Supplement: S1 Code — (c# infer.net framework). (CS) [file pone.0171240.s001.cs]

// S1 code. Code for FBISC inference model (c# infer.net framework)
/// CreateGeneNetModel method builds the core model in infer.net framewrok (for more information please visit http://infernet.azurewebsites.net/docs/default.aspx)
/// Inference model is created per node (since we solve the problem for each node independently). This enables parallel execution over nodes.

// numberOfNodes: number of all nodes (genes or proteins)
// numberOfExperiments: number of rows in our input data matrix
// ppiIndices: using this jagged we can provide prior knowled for the method: 
// - ppiIndices has numberOfNodes rows, for each node (row) the entries are the index of potential regulators of this node
// - for example if we have 5 nodes (node0 to node4) and for node0 we have no information => ppiIndices[0] = {0,1,2,3,4}
// -- if we know that node2 is 'not' regulated by itself and node3 => ppiIndices[2]={0,1,4}
// rhoPrior: is the prior on gamma in equation 8 of the paper. Normally we would choose a small value (0.5 or less) to keep the model sparse
// - If we have prior knowledge (like a potential TF for a gene), then we choose rho close to 1 (like 0.95)
// - rho elements are set for correspoinding indices in ppiIndices
// min: the minimum value observed for current node (in case we want to use the sigmoid model in equation 9)
// max: is the maximum value observed for current node (in case we want to use the sigmoid model in equation 9)


        public void CreateGeneNetModel(int numberOfNodes, int numberOfExperiments, int[] ppiIndices, 
                                        double[] rhoPrior, double min, double max)
        {
            Variable<int> numExperiment = Variable.Observed(numberOfExperiments);
            Range nodeRange = new Range(numberOfNodes).Named("nodeRange");
            Range experimentRange = new Range(numExperiment).Named("experimentRange");
            Range wRange = new Range(ppiIndices.Length).Named("wRange");
            
            /*
             * timeSeries is our observed data for expression values. 
			 * timeSeries data is introduced in two dimension 
			 * (in our preprocessing the data is preprocessed and the input/output matrices are generated as expected in the paper)
             */
            timeSeries = Variable.Array(Variable.Array<double>(nodeRange), experimentRange).Named("timeSeries");

            
            // Bernoulli variable 'selector', chooses between spike and slab for each element of w
            var rho = Variable.Array<double>(wRange).Named("rho");
            rho.ObservedValue = rhoPrior; //rhoPrior is set to 0.5 when we have no prior knowledge, otherwise it is changed
            selector = Variable.Array<bool>(wRange).Named("selector");
            selector[wRange] = Variable.Bernoulli(rho[wRange]);

            // defining the distribution over w using the selector and spike and slab
            w = Variable.Array<double>(wRange).Named("W");
			//spike and slab  part
            using (Variable.ForEach(wRange))
            {
                using (Variable.If(selector[wRange]))
                {
                    w[wRange].SetTo(Variable.GaussianFromMeanAndVariance(0, 10));
                }
                using (Variable.IfNot(selector[wRange]))
                {
                    w[wRange].SetTo(Variable.GaussianFromMeanAndVariance(0, 0.0000001);
                    
                }
            }

			// ppiIndices tells the model which of the edges shoudl be condidered in the inference....
			// by default it provides all of the edges, but if we are sure that some edges are not in the model, 
			// this can be enforced using ppiIndices... (which w (edge) indices are present in the model)				
            var wIndices = Variable.Array<int>(wRange).Named("wIndices");
            wIndices.ObservedValue = ppiIndices;
			Variable<double> intercept = Variable.GaussianFromMeanAndPrecision(0.0, 0.000001);
            outputData = Variable.Array<double>(experimentRange).Named("outputData");

            Gamma varPrior = Gamma.FromShapeAndRate(1.0, 0.1); 
            var = Variable.Random(varPrior).Named("var");

			// a subarray of nodes which should be considered as potential regulators of a gene 
            VariableArray<double> nodeSubarray = Variable.Array<double>(wRange).Named("ndoeSubarray");

            using (ForEachBlock nodeBlock = Variable.ForEach(experimentRange))
            {
                VariableArray<double> weightSumArray = Variable.Array<double>(wRange).Named("weightSum");
                nodeSubarray = Variable.Subarray(timeSeries[experimentRange], wIndices); // 
                weightSumArray[wRange] = (w[wRange] * nodeSubarray[wRange]).Named("weightSumArray");
				selfValue = Variable.Subarray(timeSeries[experimentRange], nodeIndex);
				Variable<double> selfEffect = (selfValue * (1 - deltaT * alpha));
				Variable<double> linearEffect = Variable.Sum(weightSumArray) ;

                Variable<bool> sigmoidCondition = (Variable.IsBetween(linearEffect,min,max));
                using (Variable.If(sigmoidCondition))
                {
                    outputData[experimentRange].SetTo(Variable<double>.GaussianFromMeanAndPrecision(deltaT*beta*linearEffect+intercept, var);
                }
	            using (Variable.If(sigmoidCondition))
                {
                    outputData[experimentRange].SetTo(Variable<double>.GaussianFromMeanAndPrecision(linearEffect+intercept, var));
                }
            	using (Variable.IfNot(sigmoidCondition))
                {
                    Variable<bool> isGreaterThanMax = (linearEffect > max);
                    using (Variable.If(isGreaterThanMax)) {
                      outputData[experimentRange].SetTo(Variable<double>.GaussianFromMeanAndPrecision(max, var));
                    }
                    using (Variable.IfNot(isGreaterThanMax)) {
                      outputData[experimentRange].SetTo(Variable<double>.GaussianFromMeanAndPrecision(min, var));
                    }
                }
				// If you wish to model only linear relations the outputData can be defined simply using:
				// outputData[experimentRange] = Variable<double>.GaussianFromMeanAndPrecision(linearEffect, var);
            }				
            experimentRange.AddAttribute(new Sequential()); 
        }


		

		// This method creates an inference engine and runs the model.
		// mainNode: index of the node being infered.
		// observedInput: The data provided in a matrix: each row corresponds to a time step t for which the data in t+1 is available.
		// observedOutput: The corresponding output (data at time t+1) for each relative index in observedInput
		// * All the data should be read and made available in the two above matrices. Data Normalization is necessary (section 3.2 of the paper.)
		// * You may add aditional parameters here in order to print the result (for example a list of gene names, etc.) 
		public void InferModel(int mainNode, double[][] observedInput, double[] observedOutput)
        {
			// Providing the observed data for the model created in CreateGeneNetModel method
            timeSeries.ObservedValue = observedInput;
            outputData.ObservedValue = observedOutput;
            
			// Create an inference engine 
			// For more information about parameters set here please visit http://infernet.azurewebsites.net/docs/default.aspx
            InferenceEngine engine = new InferenceEngine();
            engine.Compiler.UseSerialSchedules = true;
            engine.Compiler.ReturnCopies = true;
            engine.Compiler.FreeMemory = false;
            engine.Compiler.WriteSourceFiles = true;
            //engine.Compiler.GivePriorityTo(typeof(GaussianProductOp_SHG09));
            //engine.Compiler.GeneratedSourceFolder = true;
            engine.Compiler.GenerateInMemory = true;
            engine.Compiler.AddComments = false;
            engine.ShowProgress = false; 

            engine.Algorithm = new ExpectationPropagation();
            //engine.Compiler.GivePriorityTo(typeof(GaussianProductOp_SHG09));
            engine.NumberOfIterations = 100;

			// Here are the posteriors! One can run any method in order to print the result or do any test.			
            Gaussian[] wPosterior = engine.Infer<Gaussian[]>(w); 
            Bernoulli[] selectorPosterior = engine.Infer<Bernoulli[]>(selector);			
			
        }
	
